# Supplementary material for: The role of attention in subliminal semantic processing: A mouse tracking study
Source: PLoS One. 2017 Jun 13;12(6):e0178740. doi: 10.1371/journal.pone.0178740 (PMC5469464; doi:10.1371/journal.pone.0178740)
Supplement: S2 File — (XLSX) [file pone.0178740.s002.xlsx]

## Sheet: 4SOA data.xls
Subjects' ID	SOA	uncued congruent AUC	uncued incongruent AUC	cued congruent AUC	cued incongruent AUC	uncued priming magnitude	cued priming magnitude	d'
1	50ms	6007.26	5741.19	4337.41	6342.85	-266.067	2005.45	-0.0522452
2	50ms	272.434	738.786	1256.16	954.986	466.352	-301.176	-0.0785198
3	50ms	3869.12	3861.3	3741.31	2576.14	-7.8174	-1165.17	0.0261315
4	50ms	2494.51	4915.93	2560.34	2600.9	2421.42	40.5613	-0.0261137
5	50ms	283.703	416.968	259.68	892.446	133.265	632.766	-0.0783589
6	50ms	11242	11895.5	12422.6	13212.2	653.489	789.578	0.0783589
7	50ms	3961.83	4962.35	4324.08	4353.29	1000.52	29.2116	0.0522274
8	50ms	2045.84	3037.1	618.77	1936.32	991.26	1317.55	0.0783589
9	50ms	2087.81	2468.75	3149.06	2391.11	380.936	-757.953	-0.0261137
10	50ms	555.588	2443.35	1483.06	4287.08	1887.77	2804.02	0.0784124
11	50ms	7022.23	10837.1	9998.5	9925.94	3814.88	-72.5624	0.105066
12	50ms	3228.68	3739	1523.24	2367.67	510.318	844.43	0.0522274
13	50ms	648.661	4947.83	3171.84	3611.19	4299.17	439.353	0.0522452
14	50ms	1941.79	3650.56	3569.45	2046.73	1708.77	-1522.72	0
15	50ms	6358.08	8271.66	10272.9	9705.89	1913.58	-567.053	-0.0262932
16	50ms	3206.33	4220.05	3512.66	4126.88	1013.72	614.224	0
17	50ms	6381.58	9536.27	7353.28	7990.12	3154.69	636.836	0
18	50ms	-1107.98	-906.316	872.697	-326.798	201.668	-1199.49	0
19	50ms	717.017	2665	1193.37	1682.54	1947.99	489.164	0.0522452
20	50ms	4916.1	5061.24	4363.39	6648.15	145.145	2284.76	0
21	50ms	-789.865	1107.75	-1372.72	46.6542	1897.61	1419.37	0
22	50ms	-1249.16	-352.511	-191.556	-1741.54	896.646	-1549.98	0.026221
23	50ms	8622.41	8722.96	10011.7	9821.06	100.547	-190.685	-0.0522987
24	50ms	2221.99	609.133	1219.03	1561.7	-1612.85	342.678	0.0261137
25	50ms	8096.54	3983.44	5008.74	4914.38	-4113.1	-94.3584	0.0261672
26	50ms	10250.2	10776.6	11749.9	11099.7	526.438	-650.192	-0.0522452
27	50ms	370.425	32.1367	136.606	1198.98	-338.288	1062.37	0.104633
28	50ms	10025	12079.4	12823	12457.9	2054.42	-365.053	0
29	50ms	3916.01	8080.3	5559.04	3831.73	4164.3	-1727.31	-0.0261137
30	50ms	1738.27	2470.23	2498.29	2135.43	731.963	-362.862	0
31	50ms	3910.84	4289.44	962.465	1191.01	378.595	228.548	0
32	50ms	11878.3	12579.2	12083.1	13292.5	700.922	1209.42	0
33	50ms	10466.7	11732.2	11406	11000.5	1265.47	-405.51	-0.10449
34	50ms	1723.04	1190.32	1284.55	1990.54	-532.718	705.988	-0.0783589
35	50ms	7660.35	10359.7	7913.49	9522.2	2699.35	1608.71	0
36	50ms	794.011	-461.825	129.338	834.655	-1255.84	705.317	0.0788983
37	50ms	3663.22	3241.97	2586.78	3281.3	-421.256	694.522	0.0522274
38	50ms	12730.1	9585.2	12031.6	13728.5	-3144.92	1696.91	-0.0783589
39	50ms	9079.85	2336.99	6981.09	6572.35	-6742.86	-408.74	0.0261137
40	50ms	5420.53	5314.56	5458.98	6067.22	-105.976	608.243	0.0261137
41	50ms	13281.7	13511.7	14036.9	12677.1	229.965	-1359.79	-0.0522987
42	50ms	1173.97	856.535	313.697	952.771	-317.431	639.074	-0.0522274
43	50ms	-1384.86	245.836	-1420.92	-340.617	1630.7	1080.31	-0.104526
44	50ms	9925.57	9497.91	8856.82	9273.37	-427.659	416.55	0.0261137
45	50ms	4677.75	3126.77	2852.02	4370.26	-1550.98	1518.24	-0.0261137
46	200ms	-515.854	613.915	-1067.57	838.24	1129.77	1905.81	-0.0261672
47	200ms	8657.34	9741.84	7134.58	8038.38	1084.5	903.805	0.0784124
48	200ms	7355.68	6185.09	5721.61	5917.03	-1170.6	195.418	-0.104526
49	200ms	2054.96	8216.03	5133.51	6058.64	6161.08	925.131	0.0525142
50	200ms	8583.2	7320.56	7250.38	8221.06	-1262.64	970.671	0.0525142
51	200ms	5030.75	5355.04	3752.01	4392.15	324.295	640.132	-0.0783589
52	200ms	2665.62	3649.91	2887.36	4068.47	984.285	1181.11	0.0783589
53	200ms	4944.87	5695.25	3677.09	5073.93	750.383	1396.84	-0.0522452
54	200ms	5843.67	3986.64	3738.83	4566.29	-1857.03	827.463	-0.0783589
55	200ms	6563.16	6571.52	5359.3	6127.29	8.36483	767.985	0.0261315
56	200ms	3229.62	2027.56	362.33	885.234	-1202.05	522.903	0.0261137
57	200ms	11869.1	13168.3	11850.2	11894.6	1299.27	44.423	-0.0261137
58	200ms	10508.9	10299.8	11582.6	12767.3	-209.165	1184.74	-0.0522452
59	200ms	1266.51	1548.79	1940.08	971.143	282.285	-968.935	0.104813
60	200ms	1982.47	2166.67	2061.79	3367.09	184.2	1305.31	-0.0522274
61	200ms	13052.2	14126.5	12448.2	13139	1074.3	690.745	0.0261315
62	200ms	1144.1	3561.84	2908.45	2049.53	2417.74	-858.916	-0.0261137
63	200ms	3545.55	3355.95	2670.22	2783.14	-189.596	112.923	0.0261137
64	200ms	10583	11752.4	11558.9	13229.8	1169.37	1670.98	-0.0786815
65	200ms	10139.3	11673.1	11370.2	14104.9	1533.83	2734.64	-0.10449
66	200ms	13285.3	13445.5	13513.6	15643.2	160.232	2129.58	-0.0522274
67	200ms	-3966.14	-6157.84	-3994.83	-2320.66	-2191.71	1674.17	-0.0784124
68	200ms	7467.75	8264	7822.41	8993.51	796.245	1171.1	-0.0526772
69	200ms	13332.3	13013.2	15147	15206.6	-319.096	59.6111	-0.0261672
70	200ms	8599.01	9825.08	6566.46	6343.13	1226.08	-223.328	0
71	200ms	5588.35	6530.3	8096.46	8708.63	941.956	612.171	0.0522452
72	200ms	9670.35	10694.8	7976.08	7434.44	1024.42	-541.636	0
73	200ms	8732.28	10747.3	11168.2	12396.2	2014.99	1227.96	0
74	200ms	2826.11	2149.72	227.14	1723.76	-676.392	1496.61	0.0523883
75	200ms	305.309	1348.34	1007.31	1390.68	1043.03	383.37	0.0261137
76	200ms	7581.48	9473.47	6474.97	9095.05	1891.99	2620.09	0.0783589
77	200ms	1582.17	489.079	-107.03	238.067	-1093.09	345.097	0.0786815
78	200ms	6523.63	7786.96	4438.33	4876.71	1263.32	438.384	0.0261315
79	200ms	2163.4	4352.94	1236.38	2434.2	2189.53	1197.81	0
80	200ms	9549.17	10410.6	9976.14	11143	861.379	1166.86	0
81	200ms	7977.08	6121.79	4685.07	6645.78	-1855.3	1960.71	0
82	200ms	12137.1	12695	11013.7	13255.5	557.887	2241.84	0.0522987
83	200ms	1152.22	2308.93	880.329	1412.27	1156.71	531.939	-0.0261137
84	200ms	10936.3	9491.61	9030.61	9695.72	-1444.72	665.112	0
85	200ms	4964.27	3751.27	3719.12	4531.6	-1213.01	812.488	0
86	200ms	2379.25	1123.76	1798.94	5685.52	-1255.49	3886.59	0
87	200ms	10588.4	10213.7	9358.57	11398.9	-374.69	2040.33	0.0261137
88	200ms	2907.21	4306.19	2270.87	2889.83	1398.98	618.956	-0.0261672
89	200ms	1177.34	2779.48	-184.039	2097.13	1602.14	2281.17	0.0522452
90	200ms	2008.72	2383.71	1239.16	2005.71	374.994	766.55	0
91	500ms	3616.63	2023.6	2866.91	3679.98	-1593.03	813.067	0.0522452
92	500ms	8418.66	6588.06	8071.19	10204.1	-1830.6	2132.94	-0.0784124
93	500ms	608.568	1185.23	1138.96	748.966	576.661	-389.998	-0.0522274
94	500ms	4935.4	3128.99	3339.66	2902.22	-1806.42	-437.433	0.0522452
95	500ms	6294.85	5335.14	5497.5	5293.57	-959.715	-203.933	0.10449
96	500ms	1085.34	1058.58	1046.62	2272.02	-26.758	1225.4	0.105066
97	500ms	10568.2	9926.61	10626.5	12184.2	-641.625	1557.7	0.0783589
98	500ms	-365.762	-45.822	1077.93	1680.81	319.94	602.876	0
99	500ms	3771.48	2361.7	2807.49	2590.58	-1409.78	-216.914	0
100	500ms	8757.48	11607.5	8516.25	10200.6	2850.01	1684.35	0
101	500ms	-516.067	1036.42	1153.76	420.604	1552.49	-733.161	-0.0261672
102	500ms	13130.7	9884.15	11943.4	13859.4	-3246.56	1916.03	0
103	500ms	4513.85	5563.55	4682.55	3380.01	1049.7	-1302.53	0.0786815
104	500ms	10902.8	12995.5	11001.3	12216.8	2092.68	1215.47	-0.0522274
105	500ms	3042.02	4724.41	1897.89	1743.43	1682.39	-154.457	0
106	500ms	9205.46	8172.71	10346.3	10193	-1032.74	-153.295	0
107	500ms	12651.1	13417.3	13904.6	14095.6	766.219	191.072	0
108	500ms	203.097	2737.36	292.378	1225.54	2534.26	933.163	0.0261137
109	500ms	614.326	1068.41	300.852	928.416	454.083	627.564	0
110	500ms	11620.2	10468.9	10030	12054.2	-1151.34	2024.22	0
111	500ms	1849.36	2003.22	1728.26	1191.8	153.862	-536.454	-0.104633
112	500ms	7848.1	7828.58	8499.19	9360.61	-19.519	861.42	0.0261137
113	500ms	5804.49	6122.98	7175.35	6943.41	318.489	-231.937	-0.0261137
114	500ms	8742.47	8997.74	7509.61	6948.14	255.27	-561.473	0
115	500ms	6137.77	7337.88	5168.44	5579.58	1200.11	411.136	-0.0785198
116	500ms	-340.036	-2501.72	-2500.2	-1740.94	-2161.68	759.264	0.0261137
117	500ms	4039.41	2614.61	5240.28	5502.38	-1424.8	262.106	-0.0261137
118	500ms	16292.8	13758.8	14164.4	13990.2	-2534.02	-174.152	-0.0783589
119	500ms	8599.26	12276.3	10707.4	11838.4	3677.04	1131.02	0.130658
120	500ms	1153.83	2778.98	83.1327	1062.88	1625.16	979.743	0.0261137
121	500ms	10363.8	10294.1	10630.8	11131.9	-69.6992	501.045	-0.0783589
122	500ms	9494.55	6637.58	9434.57	8885.68	-2856.98	-548.89	-0.0522452
123	500ms	4475.07	6760.02	3294.99	4072.95	2284.95	777.955	-0.0784124
124	500ms	3374.04	2561.74	1348.01	2894.91	-812.3	1546.9	-0.0522987
125	500ms	1950.74	1413.63	1188.21	1234.96	-537.111	46.7525	0.0261137
126	500ms	3872.77	4623.05	3491.78	5596.31	750.282	2104.53	-0.0261137
127	500ms	2441.37	4058.25	1435.35	3385.03	1616.89	1949.68	0.0522274
128	500ms	5717.2	3584.1	5948.58	4772.35	-2133.11	-1176.22	-0.0522452
129	500ms	1719.32	2832.88	1026.13	1607.24	1113.56	581.109	0.0795017
130	500ms	5098.8	7025.42	4102.65	4732.45	1926.63	629.793	0.0522274
131	500ms	10940.4	14261.1	10470.2	14601.7	3320.78	4131.44	-0.10449
132	500ms	4257.36	5311.27	1938.07	3348.37	1053.91	1410.3	0.0522452
133	500ms	11401.9	12154.5	11103.4	11448.5	752.618	345.089	-0.0261137
134	500ms	380.425	888.79	176.015	52.0777	508.365	-123.938	-0.0261137
135	500ms	-362.361	2481.15	780.655	776.956	2843.52	-3.69869	0.0522274
136	1000ms	-414.013	-1065.49	-379.33	-1090.25	-651.479	-710.924	-0.0522274
137	1000ms	7871.7	8014.61	8441.37	8084.37	142.913	-357.004	0.0261315
138	1000ms	14057.6	13306.8	13336.7	12395.6	-750.852	-941.11	-0.0788983
139	1000ms	7703.91	7236.99	7161.44	7852.03	-466.919	690.594	0.0522987
140	1000ms	3075.11	2945.57	1767.52	2728.66	-129.549	961.144	0.0261137
141	1000ms	11185.6	8590.09	8071.08	9139.13	-2595.55	1068.04	-0.0522452
142	1000ms	11085	12339.6	9376.25	10398	1254.61	1021.77	-0.0261137
143	1000ms	4692.94	3744.26	3789.88	3614.43	-948.688	-175.457	0.0783589
144	1000ms	2230.89	1148.18	2358.52	1254.45	-1082.71	-1104.06	-0.0783589
145	1000ms	7038.38	6097.22	6357.14	9428.47	-941.165	3071.33	-0.0783589
146	1000ms	0.0188	35.587	-15.5851	-12.0627	35.5682	3.52232	-0.0522274
147	1000ms	4996.53	5445.29	4821.9	4690.84	448.758	-131.064	0.0785198
148	1000ms	9024	7530.98	9466.16	8785.67	-1493.02	-680.488	0.0261137
149	1000ms	7340.18	7228.73	8026.61	7928.12	-111.456	-98.4846	0.104526
150	1000ms	10887.1	10516	10488.5	11175.1	-371.115	686.571	-0.0522452
151	1000ms	12181.2	11062.1	8836.49	9336.62	-1119.12	500.127	0.0261137
152	1000ms	3400.97	4366.41	5021.64	5575.11	965.441	553.474	-0.0522274
153	1000ms	6558.99	4954.75	3926.33	8349.24	-1604.24	4422.91	-0.0522274
154	1000ms	12010.2	11352.9	11966.7	12857.4	-657.285	890.74	0.0522274
155	1000ms	1143.24	549.654	1531.32	1721.36	-593.588	190.046	0.0522987
156	1000ms	1799.94	927.732	807.643	-151.193	-872.205	-958.836	0.0261315
157	1000ms	8591.6	7037.71	8247.54	8626.2	-1553.89	378.666	0.0261137
158	1000ms	13224.8	14431.6	15084.1	14895.8	1206.8	-188.277	-0.0261137
159	1000ms	11571.4	14041.8	11534	13293.8	2470.48	1759.72	-0.0783589
160	1000ms	12656.9	13073.9	13964.3	12996	416.953	-968.351	0.0785198
161	1000ms	12044.9	15298.7	16598.4	15330.3	3253.76	-1268.12	0
162	1000ms	9801.39	10518	7139.11	7619.05	716.644	479.934	0
163	1000ms	10068.1	10466.1	10308.3	10305.7	398.013	-2.55396	0
164	1000ms	8028.2	6401.23	6048.8	6807.8	-1626.97	759.005	-0.0261137
165	1000ms	8693.29	9066.44	8661.59	8810.12	373.143	148.537	0
166	1000ms	4223.79	3866.47	4665.5	4307.28	-357.319	-358.225	0
167	1000ms	10190.4	10125.7	10743.9	9977.62	-64.6845	-766.326	0.0522274
168	1000ms	2837.44	2323.33	1623.4	1589	-514.106	-34.4027	0
169	1000ms	1675.21	989.158	505.869	636.589	-686.057	130.72	-0.104526
170	1000ms	-14.247	24.8019	-475.922	-248.351	39.0489	227.571	0.0262932
171	1000ms	8715.73	10962.2	4462.06	7821.29	2246.44	3359.23	0.0261672
172	1000ms	7125.07	4293.37	3976.89	1010.74	-2831.69	-2966.14	0
173	1000ms	2228.53	869.773	1790.32	1407.82	-1358.76	-382.496	0
174	1000ms	10916.9	12405.6	11352.7	9811.82	1488.66	-1540.89	0
175	1000ms	9542.77	6465.85	10215.6	6286.71	-3076.92	-3928.88	0
176	1000ms	2107.98	822.524	2379.65	1767.24	-1285.46	-612.408	0.026221
177	1000ms	7314.99	8335.69	10608.7	9282.61	1020.7	-1326.04	-0.10449
178	1000ms	11223.2	11973.6	10360	11883.6	750.441	1523.51	-0.0261137
